# Supplementary material for: PRMDA: personalized recommendation-based MiRNA-disease association prediction
Source: PubMed Central journal article supplement (PMC5689632; doi:10.18632/oncotarget.20996), 2017-09-18
Supplement: oncotarget-08-85568-s001.pdf [file oncotarget-08-85568-s001.pdf]

## **PRMDA: personalized recommendation-based MiRNA-disease association prediction**

### **SUPPLEMENTARY MATERIALS**

**Supplementary Table 1: We provided a comparison table, comparing input, output and limitation for every computational miRNA-disease association prediction model mentioned in the manuscript. See Supplementary\_Table\_1**

**Supplementary Table 2: We further applied PRMDA to prioritize all the candidate miRNA-disease pairs based on all the miRNA-disease associations recorded in HMDD database as training samples. Prediction results were publicly released for further research and experimental validation. See Supplementary\_Table\_2**

**Supplementary Table 3: We provided disease semantic similarity matrix, constructed according to disease semantic similarity model 1. See Supplementary\_Table\_3**

**Supplementary Table 4: We provided disease semantic similarity matrix, constructed according to disease semantic similarity model 2. See Supplementary\_Table\_4**

**Supplementary File 1: We provided a zip file, containing the rank of all miRNA-disease association pairs for each disease in separate file. See Supplementary\_File\_1**
